# Supplementary material
Source: PubMed Central journal article supplement (PMC4218712)
Supplement: ac502529q_si_001.pdf [file ac502529q_si_001.pdf]

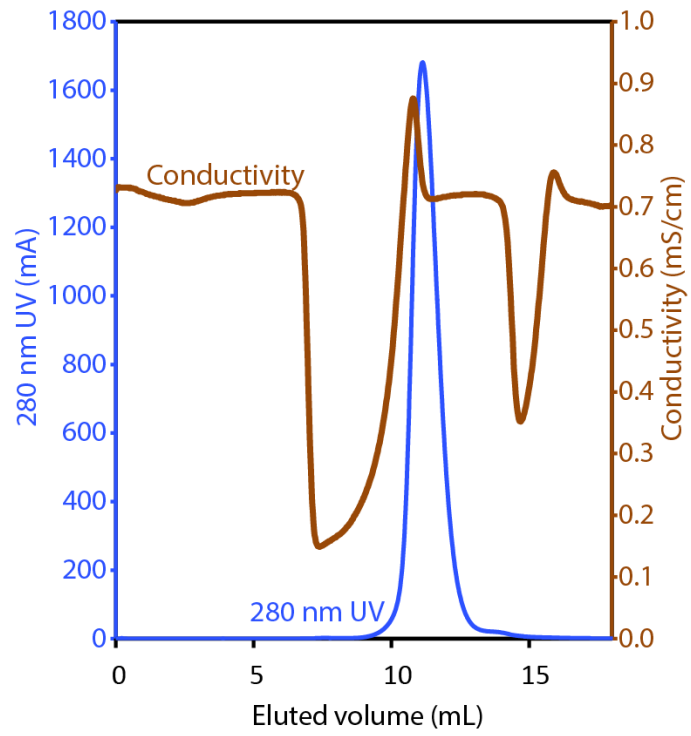

Figure S1 Size exclusion chromatography (SEC) monodispersity of the purified IgG 4 analyzed by high-throughput thermal stability assay based on ATR-FTIR spectroscopic imaging.
